# Supplementary material
Source: PubMed Central journal article supplement (PMC4289094)
Supplement: NIHMS640073-supplement-Online_tables.pdf [file NIHMS640073-supplement-Online_tables.pdf]

## ONLINE SUPPLEMENT

SOLUBLE GUANYLATE CYCLASE IS REQUIRED FOR SYSTEMIC VASODILATION

BUT NOT POSITIVE INOTROPY INDUCED BY NITROXYL (HNO) in the MOUSE

Guangshuo Zhu<sup>1</sup>, Dieter Groneberg<sup>2</sup>, Gautam Sikka<sup>3</sup>, Daijiro Hori<sup>4</sup>, Mark J. Ranek<sup>1</sup>,

Taishi Nakamura<sup>1</sup>, Eiki Takimoto<sup>1</sup>, Nazareno Paolucci<sup>1</sup>,

Dan E. Berkowitz<sup>3</sup>, Andreas Friebe<sup>2</sup>, David A. Kass<sup>1</sup>

- 1) Department of Medicine, Division of Cardiology; Johns Hopkins School of Medicine, Baltimore MD (USA) 21205
- 2) Institute of Vegetative Physiology, Julius Maximillians-Universität Würzburg, Germany
- 3) Department of Anesthesia, Johns Hopkins Medical Institutions, Baltimore MD (USA)
- 4) Department of Surgery, Johns Hopkins Medical Institutions, Baltimore MD (USA)

Supplemental Tables : S1 and S2

Supplemental Table S1

Dose-dependent effect of CXL-1020 in the normal (C57Bl/6J) mouse heart.

| Parameter                                     | Baseline   | ----- CXL-1020(ug/kg/min) ----- |              |              | p                    |
|-----------------------------------------------|------------|---------------------------------|--------------|--------------|----------------------|
|                                               |            | 200                             | 300          | 500          |                      |
| Heart Rate (min <sup>-1</sup> )               | 578.9±27.4 | 576.0±27.1                      | 583.3±24.5   | 598.5±21.2   | 0.524                |
| LVP <sub>max</sub> (mmHg)                     | 99.3±3.0   | 94.7±2.4 ‡                      | 93.5±2.7 ‡   | 88.4±3.3 ‡   | 1x10 <sup>-9</sup>   |
| LVP <sub>es</sub> (mmHg)                      | 93.6±3.7   | 88.1±3.1 †                      | 85.7±3.5 ‡   | 78.6±4.7 ‡   | 6x10 <sup>-8</sup>   |
| SV (μl)                                       | 19.9±2.3   | 21.9±2.2 *                      | 24.3±2.5 ‡   | 27.0±2.6 ‡   | 1x10 <sup>-8</sup>   |
| EF (%)                                        | 54±2       | 59±1                            | 62±4 ‡       | 64±3 ‡       | 2x10 <sup>-4</sup>   |
| dP/dt <sub>max</sub> /IP (sec <sup>-1</sup> ) | 163.0±11.0 | 168.4±9.7                       | 182.7±10.2 † | 215.1±13.8 † | 2.3x10 <sup>-5</sup> |

Data are mean ± SEM, n=10 in each group. P value in table is for drug effect in repeated measures analysis of co-variance, \*P< 0.05; † p<0.01; ‡p<0.001 versus baseline by paired Student's t-test with Bonferoni correction for multiple comparisons.

Supplemental Table S2

Effect of 500 mg/kg/min of CXL-1020 in sGC-knock out mice (GCKO) and littermate controls (WT).

| Parameter<br>CXL-1020    | p                    | WT         |                            | p    | GCKO       |            |       |
|--------------------------|----------------------|------------|----------------------------|------|------------|------------|-------|
|                          |                      | Baseline   | CXL-1020<br>(500ug/kg/min) |      | Baseline   |            |       |
| (500ug/kg/min)           |                      |            |                            |      |            |            |       |
| Heart Rate               | (min <sup>-1</sup> ) | 606±0.0    | 606±0.0                    | 1.00 | 606±0.0    | 603.6±2.2  | 0.363 |
| LVP <sub>max</sub>       | (mmHg)               | 103.8±6.2  | 88.3±4.3                   | 0.00 | 126.2±7.7  | 133.4±6.4  | 0.147 |
| LVP <sub>es</sub>        | (mmHg)               | 97.1±6.9   | 78.4±3.6                   | 0.00 | 116.4±5.6  | 121.1±6.9  | 0.434 |
| SV                       | (μl)                 | 21.5±0.7   | 26.1±1.9                   | 0.01 | 21.6±0.9   | 22.1±1.0   | 0.667 |
| EF                       | (%)                  | 55±1       | 63±2                       | 0.00 | 58±3       | 60±2       | 0.118 |
| dP/dt <sub>max</sub> /IP | (sec <sup>-1</sup> ) | 204.7±11.7 | 218.5±11.3                 | 0.00 | 219.5±11.8 | 240.9±4.02 | 0.050 |

Data are mean ± SEM, n=6 in each group. P values are for paired Student's t-test versus within each group.
